# Supplementary material for: Mean arterial pressure and mortality in patients with distributive shock: a retrospective analysis of the MIMIC-III database
Source: PubMed Central journal article supplement (PMC6223403; doi:10.1186/s13613-018-0448-9), 2018-11-08
Supplement: 13613_2018_448_MOESM1_ESM.pdf [file 13613_2018_448_MOESM1_ESM.pdf]

**Mean Arterial Pressure and Mortality in Patients with Distributive Shock:  
A Retrospective Study Based on MIMIC-III  
Vincent JL et al.**

**Additional File 1**

**Fig. S1.** Flow chart of patient selection criteria

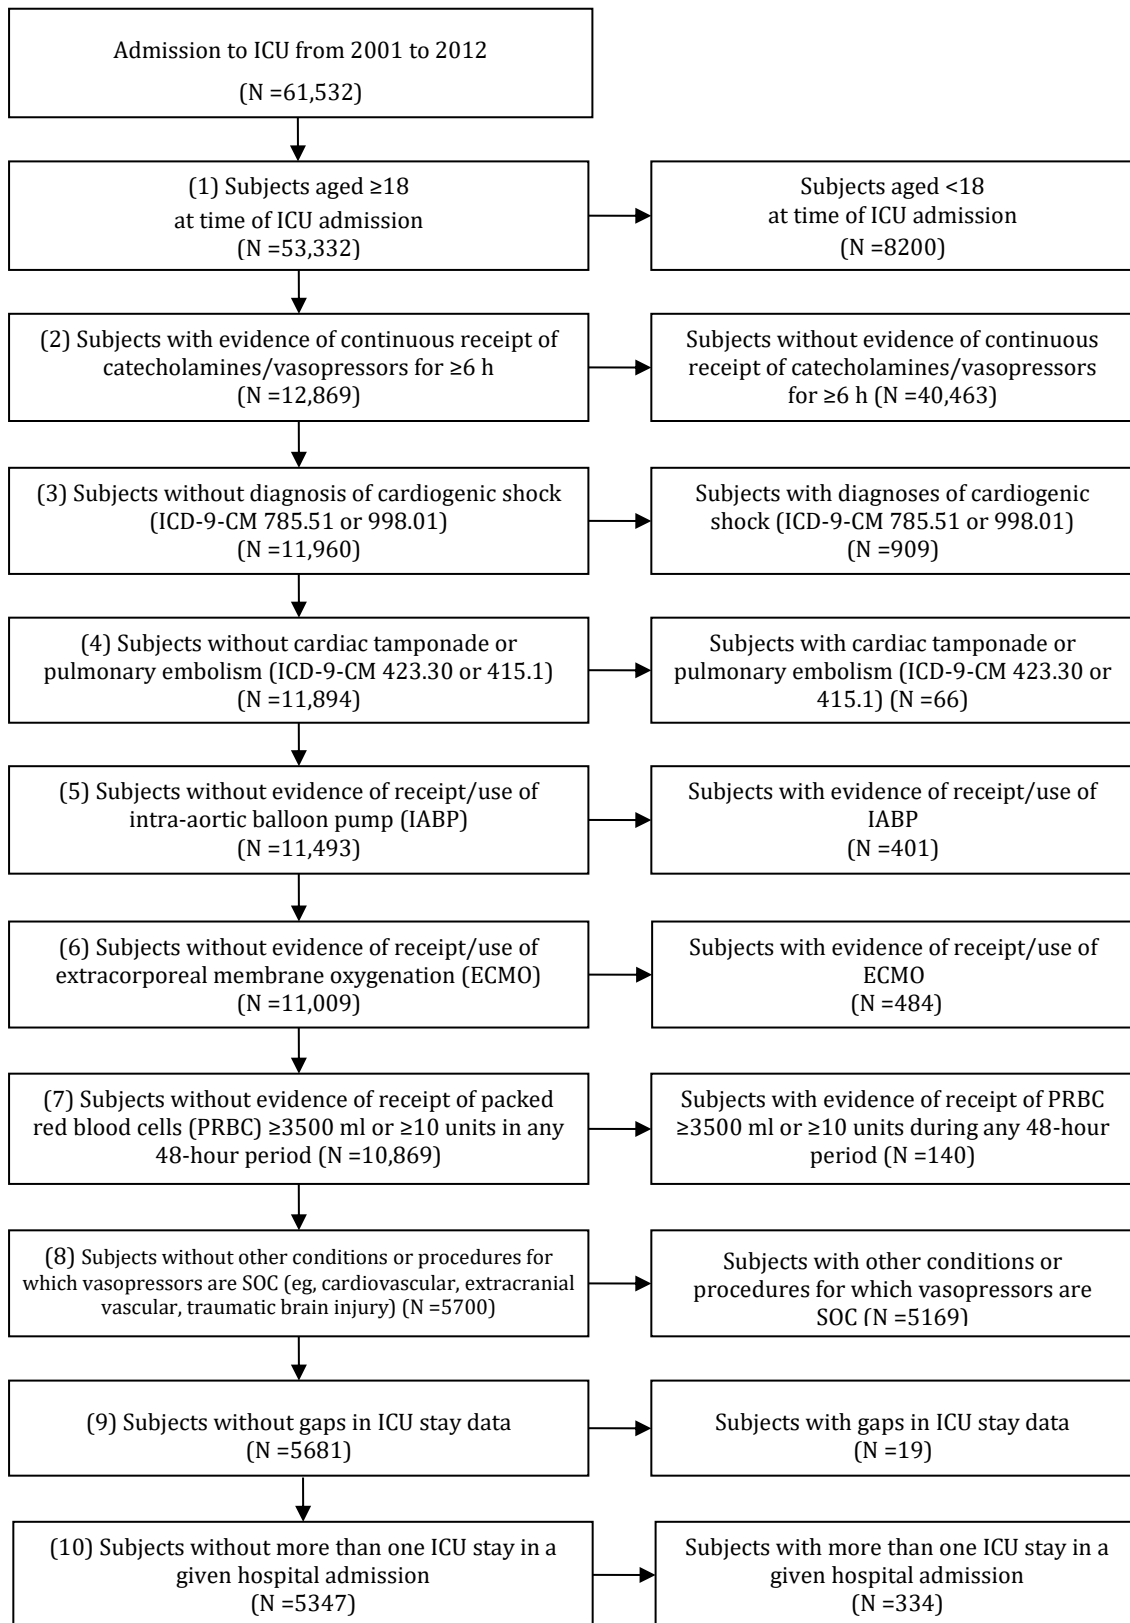

**Table S1.** Top five diagnosis-related groups and principal diagnoses among all patients and among the high-dose vasopressor subgroup

| DRG code                                       | DRG Description                                                                | All patients (%) | High-dose subgroup (%) |
|------------------------------------------------|--------------------------------------------------------------------------------|------------------|------------------------|
| <b>Top Five Diagnosis-Related Groups (DRG)</b> |                                                                                |                  |                        |
| DRG 871                                        | Septicemia or severe sepsis without medical ventilation for 96+ hours with MCC | 8.8              | 8.2                    |
| DRG 416                                        | Septicemia age >17                                                             | 7.6              | 9.8                    |
| DRG 475                                        | Respiratory system diagnosis with ventilator support                           | 4.6              | 4.6                    |
| DRG 870                                        | Septicemia or severe sepsis with medical ventilation 96+ hours                 | 3.9              | 5.7                    |
| DRG 853                                        | Infectious and parasitic diseases with operating room procedure with MCC       | 3.2              | 3.9                    |
| <b>Top Five Principal Diagnoses</b>            |                                                                                |                  |                        |
| ICD-9-CM 038.9                                 | Unspecified septicemia                                                         | 18.3             | 22.4                   |
| ICD-9-CM 518.81                                | Acute respiratory failure                                                      | 4.7              | 3.9                    |
| ICD-9-CM 038.42                                | Septicemia due to <i>Escherichia coli</i>                                      | 2.3              | 2.6                    |
| ICD-9-CM 507.0                                 | Pneumonitis due to inhalation of food or vomitus                               | 2.1              | <sup>a</sup>           |
| ICD-9-CM 038.11                                | Methicillin-susceptible <i>Staphylococcus aureus</i> septicemia                | 1.9              | 2.6                    |
| ICD-9-CM 038.49                                | Other septicemia due to Gram-negative organisms                                | <sup>a</sup>     | 2.4                    |

<sup>a</sup>Not included as this diagnosis is not in the top five for the group  
MCC = major complications/comorbidities

**Fig. S2.** ICU mortality by duration of longest episode with mean arterial pressure (MAP) <80 mmHg (mauve), <75 mmHg (orange), <65 mmHg (green), 60 mmHg (blue) and 55 mmHg (pink) in all patients in the high-dose vasopressor subgroup

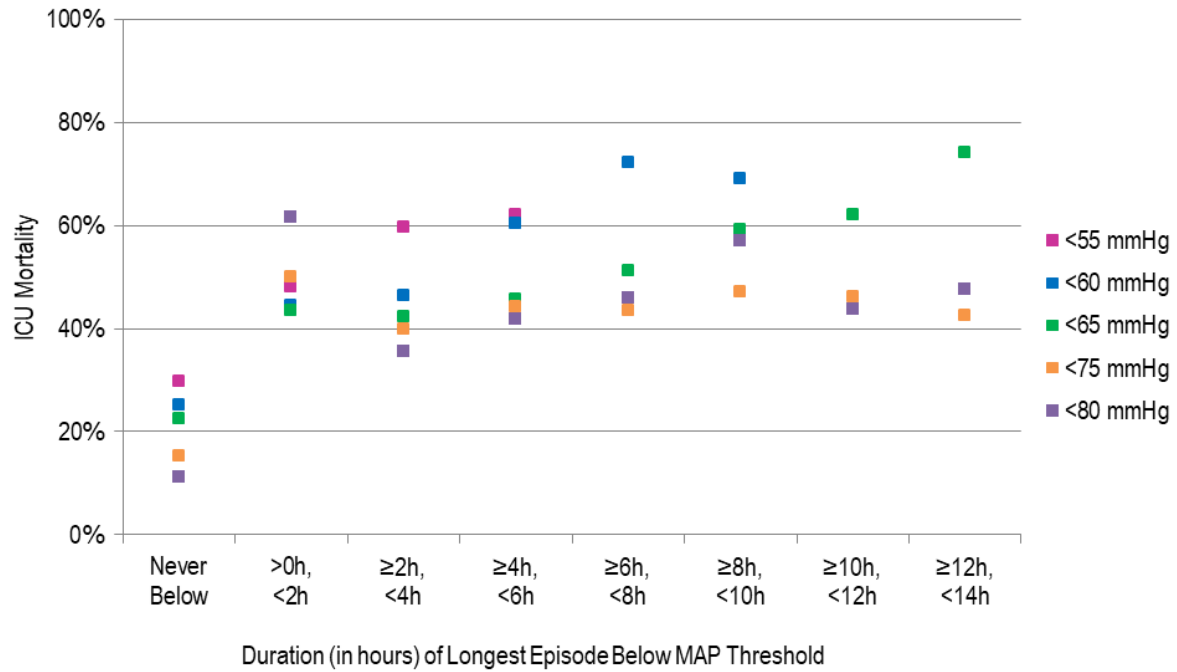

**Number of Cases**

|              |     |      |     |     |     |     |     |     |
|--------------|-----|------|-----|-----|-----|-----|-----|-----|
| MAP <55 mmHg | 422 | 1107 | 312 | 87  | —   | —   | —   | —   |
| MAP <60 mmHg | 171 | 909  | 504 | 195 | 90  | 52  | —   | —   |
| MAP <65 mmHg | 58  | 457  | 558 | 321 | 199 | 118 | 87  | 54  |
| MAP <75 mmHg | 13  | 86   | 165 | 222 | 218 | 193 | 145 | 127 |
| MAP <80 mmHg | 9   | 39   | 76  | 124 | 148 | 156 | 142 | 132 |

**Fig. S3.** ICU mortality by duration of longest episode with mean arterial pressure (MAP) <80 mmHg (mauve), <75 mmHg (orange), 65 mmHg (green), 60 mmHg (blue) and 55 mmHg (pink) among patients alive 24 hours after ICU admission

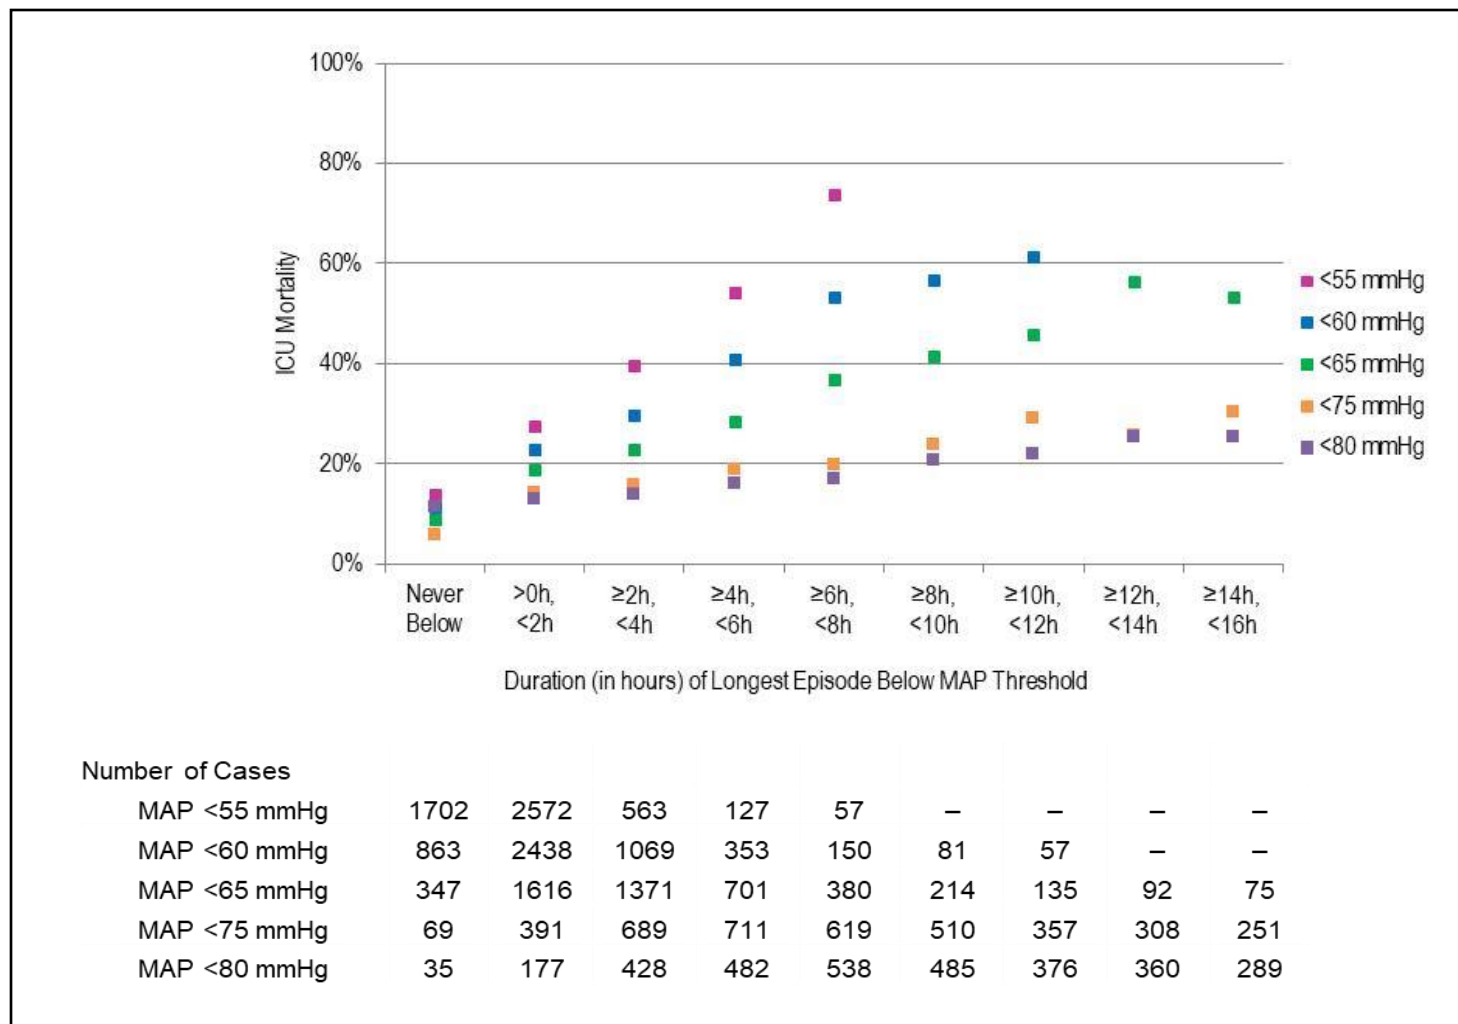

**Fig. S4.** Marginal probabilities of ICU mortality by maximum catecholamine dose

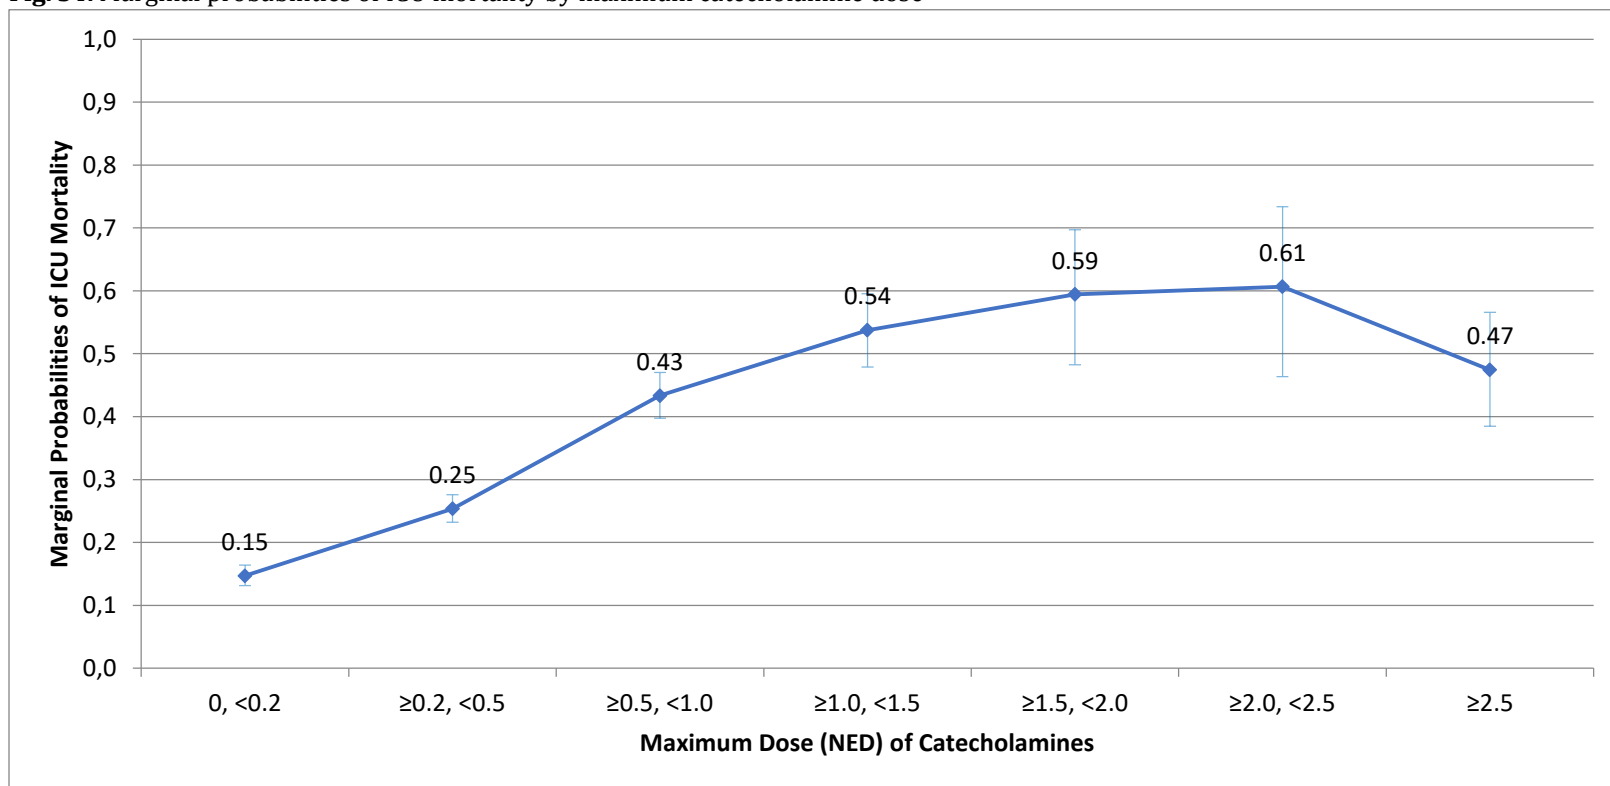

NED: norepinephrine-equivalent dose
